# Supplementary material
Source: PubMed Central journal article supplement (PMC5858725)
Supplement: NIHMS949945-supplement-supplement.pdf [file NIHMS949945-supplement-supplement.pdf]

## **SUPPORTING INFORMATION**

### **High-level production and properties of the cysteine-depleted cytochrome P450 3A4**

Irina F. Sevrioukova\*

Department of Molecular Biology and Biochemistry, University of California, Irvine, CA 92697-3900, United States

\*Corresponding author: University of California Irvine, Department of Molecular Biology and Biochemistry, 3205 McGaugh Hall, Irvine, California 92697-3900, USA. Tel: (949) 824-1953, Email: sevrioui@uci.edu

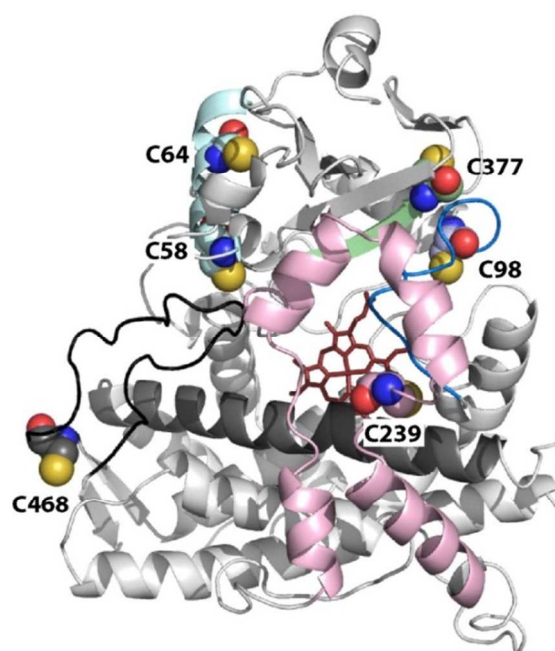

**Figure S1.** Location of non-heme-ligating cysteines in CYP3A4. Cys58 and Cys64 are part of the A-helix (light blue), Cys377 is at the end of the  $\beta$ -strand comprising the  $\beta$ -domain (green), whereas cysteines 98, 239, and 468 are located in the flexible B-B' (blue), G'-G (pink), and C-terminal loops (black), respectively. The F-G fragment and the I-helix are rendered in pink and dark gray, respectively.

```

ATGGCCCTGATTCCGGATCTGGCAATGGAGACATGGTTACTGCTGGCAGTGAGCCTGGTGCTGCTGTATCTGTATG
GTACCCATAGCCACGGTCTGTTCAAGAACTGGGCATTCCGGGTCCTACACCGTTACCGTTTTCTGGGTAACATCCTGAG
TTACCACAAAGGCTTCTGCATGTTTGATATGGAGTGCCACAAAAAGTACGGCAAGGTGTGGGGCTTCTATGACGGCCAA
CAGCCGGTGCTGGCCATCACCGACCTGATATGATTAACCCTGCTGGTGAAGGAGTGCTACAGTGTGTTACCAATC
GTCGCCCCTTTTGGTCCGGTGGGTTTCATGAAGAGCGCCATTAGCATCGCCGAAGATGAGGAGTGGAAGCGCTTACGCAG
CCTGTTAAGCCCTACCTTACCAGCGGCAAGCTGAAGGAGATGGTCCGATCATTGCCAGTACGGTGTATGTGCTGGTT
CGCAATCTGCGTCGCGAGGCCGAAACAGGCAAGCCGGTTACACTGAAGACGTGTCGGTGCCATAGCATGGACGTGA
TTACCAGCACCAGCTTCGGCGTGAATATCGATAGCCTGAACAACCCGAGGACCCGTTTGTGAAAAACAAAAGAAATT
ACTGCGCTTCGATTTCTGGACCCGTTTTTCTGAGCATCACCGTGTTCCTTTCTGATTCCGATCCTGGAAGTGCTG
AACATCTGTGTGTTCCCGCGCAAGTGACCAACTTCTGCGTAAAAGTGTTAAACGCATGAAGGAGAGCCGCTCGGAGG
ACACACAGAAACACCGCGTGGACTTCTGCGAGCTGATGATTGACAGCCAGAACAGTAAAGAGACCGAAAGCCATAAAGC
CCTGAGCGACCTGGAGCTGGTTGCCAGAGCATCATCTTCATCTTCGCGGGCTACGAGACCACCAGCAGCGTTTTAAGC
TTCATTATGTACGAGCTGGCCACCCACCCGGATGTTACGACAGAAGCTGCAAGAGGAGATCGATGCCGTGCTGCCTAATA
AGGCCCTCCTACCTATGACACCGTTCGCGAGATGGAATACCTGGATATGGTTGTGAACGAGACCCTGCGCCTGTCCC
GATTGCAATGCGCCTGGAGCGCGTGTGCAAAAAGGACGTGGAGATCAATGGTATGTTTATTCCGAAAAGGCGTTGTGGTT
ATGATCCCGAGCTACGCACTGCATCGGATCCGAAGTACTGGACAGAGCCGGAGAAGTTCTTACCGGAGCGTTTTAGCA
AGAAGAACAAGGACAACATTGACCCGTACATCTACACACCGTTCGGCAGTGGTCCTCGCAACTGTATCGGTATGCGCTT
CGCCCTGATGAACATGAAGCTGGCACTGATCCGCGTGCTGCAGAACTTTAGCTTCAAGCCGTGCAAGGAGACCCAAATC
CCGCTGAAGCTGAGCCTGGGTGGTTTATTACAGCCTGAGAAGCCGGTGGTGTGAAAGTTGAAAGCCGTGACGGCACAG
TTAGTGCGGCACACCATCATCATTA

```

**Figure S2.** cDNA sequence of the full-length WT CYP3A4 optimized for expression in *Escherichia coli*. Codon optimization and gene synthesis was conducted by Genewiz (USA). Blue and red nucleotides correspond to the C-terminal 4-histidine tag and a stop codon, respectively.

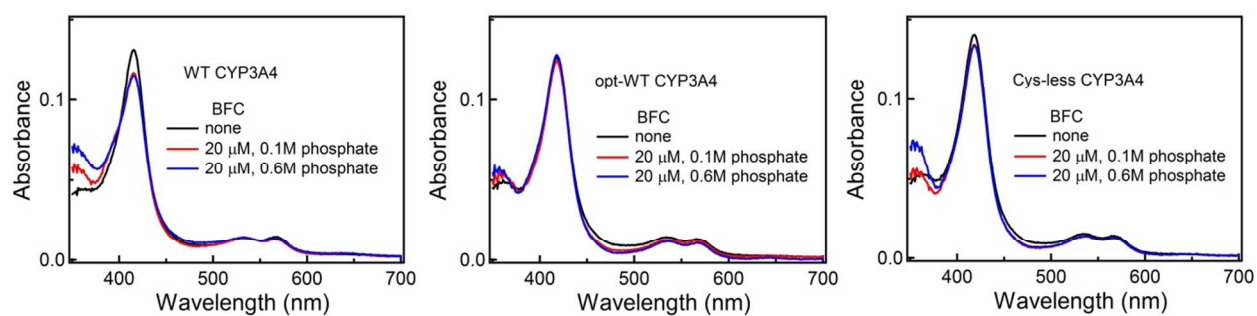

**Figure S3.** Absorbance spectra of 1.3  $\mu\text{M}$  WT, opt-WT and Cys-less CYP3A4 recorded in the absence and presence of 30  $\mu\text{M}$  7-benzoyloxy-(4-trifluoromethyl)coumarin (BFC) in 0.1 or 0.6M phosphate buffer pH 7.4. BFC induces a small high spin shift in WT but not in opt-WT or Cys-less CYP3A4.

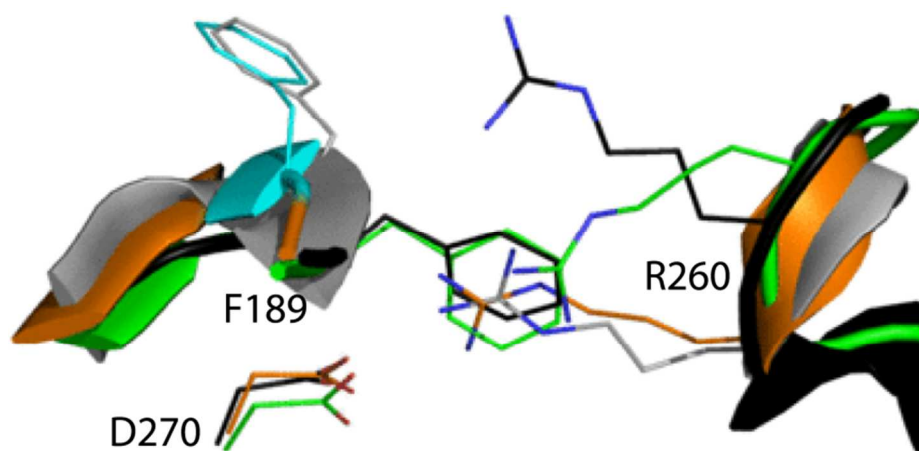

**Figure S4.** Relative orientation of Phe189, Arg260 and Asp260 in opt-WT (PDB ID: 5VCC, 1.70  $\text{\AA}$ ; orange/cyan) and the ligand-free structures of WT CYP3A4: 1TQN (2.05  $\text{\AA}$ ; black), 1W0E (2.80  $\text{\AA}$ ; gray), and 4I3Q (2.6  $\text{\AA}$ ; green). Asp270 was disordered and not modeled in the 1W0E structure. Naturally occurring heterogeneity in the Phe189-region could complicate the ligand binding and catalytic behavior of CYP3A4.

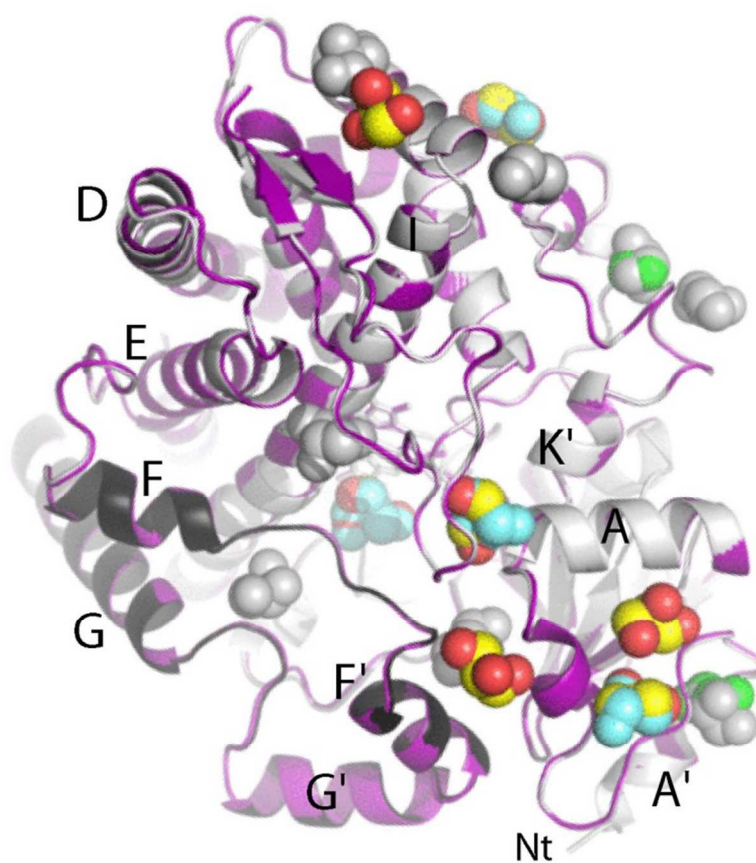

**Figure S5.** Superposition of Cys-less and opt-WT CYP3A4 (gray/black and purple, respectively). Glycerol molecules bound to the corresponding structures are shown in red/yellow and gray/cyan, respectively. Four coinciding glycerol binding sites are shown in cyan, whereas those occupied by ethylene glycol are in green.

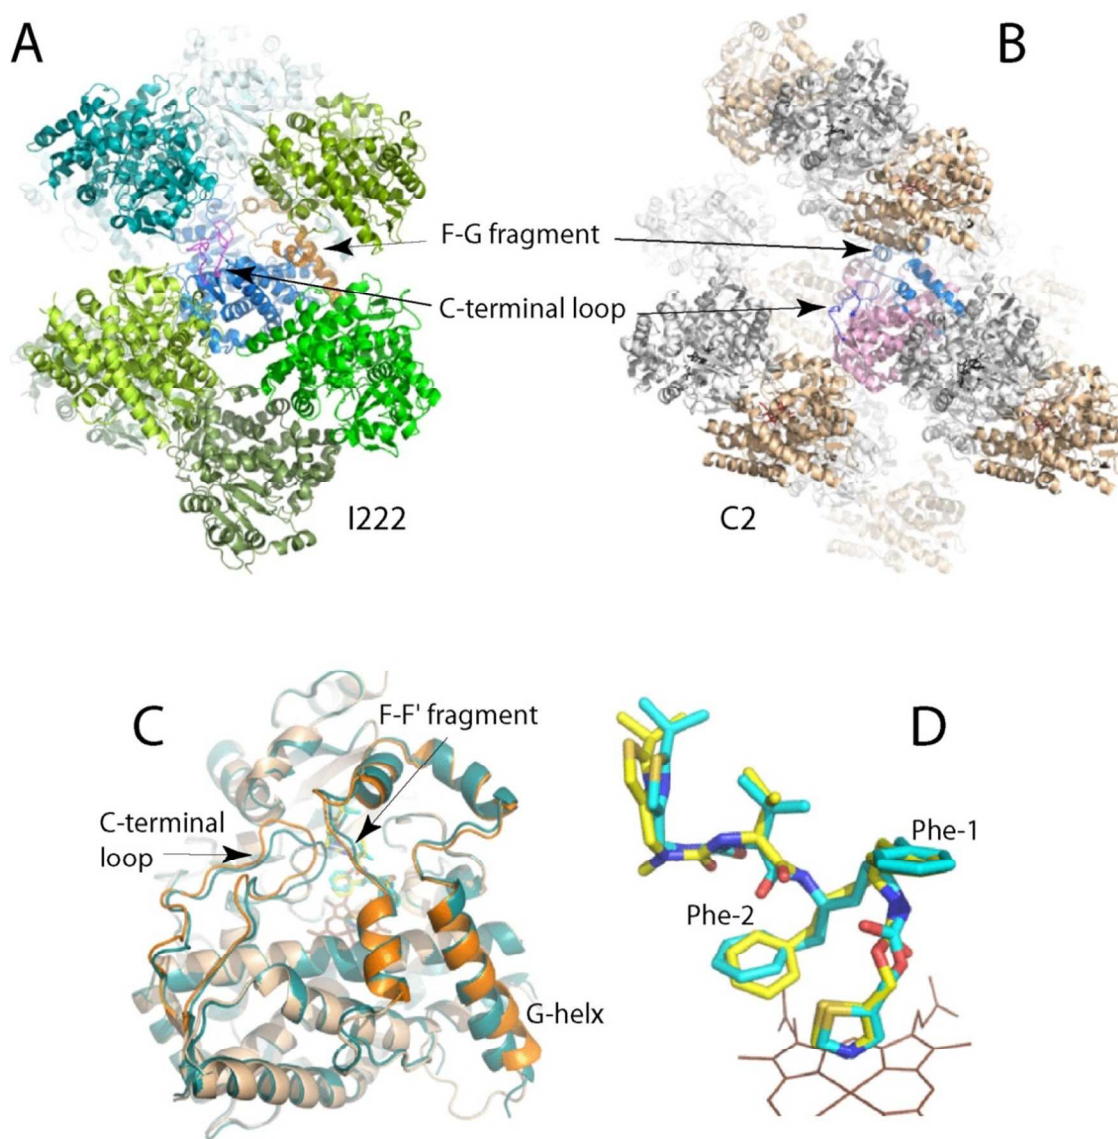

**Figure S6.** **A** and **B**, Packing of the RIT-bound WT CYP3A4 in the I222 and C2 crystal lattice (PDB ID: 5VCO and 3NXU, respectively). The latter crystal form has two molecules in the asymmetric unit, which are packed tighter and form different intermolecular contacts. **C**, Superposition of the 5VCO model (light and dark orange) and molecule A of the 3NXU structure (in cyan) shows distinct positioning of the G-helix, F-F' fragment and C-terminal loop. **D**, The RIT binding mode observed in the 5VCO and 3NXU structures (in yellow and cyan, respectively). Differences in the backbone conformation, carbonyl oxygen orientation and placement of Phe-2 indicate that crystal packing restraints can alter the ligand binding mode in CYP3A4.

**Table S1.** Data collection and refinement statistics

|                                | WT                                                                                                    | opt-WT                                                                                               | Cys-less                                                                                              |                                                                                                       |                                                                                                       |
|--------------------------------|-------------------------------------------------------------------------------------------------------|------------------------------------------------------------------------------------------------------|-------------------------------------------------------------------------------------------------------|-------------------------------------------------------------------------------------------------------|-------------------------------------------------------------------------------------------------------|
| Ligand                         | RIT                                                                                                   | water, glycerol                                                                                      | water, glycerol                                                                                       | RIT                                                                                                   | BEC                                                                                                   |
| PDB ID                         | 5VCO                                                                                                  | 5VCC                                                                                                 | 5VCD                                                                                                  | 5VCE                                                                                                  | 5VCG                                                                                                  |
| <i>Data statistics</i>         |                                                                                                       |                                                                                                      |                                                                                                       |                                                                                                       |                                                                                                       |
| Space group                    | I222                                                                                                  | I222                                                                                                 | I222                                                                                                  | I222                                                                                                  | I222                                                                                                  |
| Unit cell parameters           | $a = 77 \text{ \AA}, b = 100 \text{ \AA},$<br>$c = 125 \text{ \AA}; \alpha, \beta, \gamma = 90^\circ$ | $a = 76 \text{ \AA}, b = 99 \text{ \AA},$<br>$c = 134 \text{ \AA}; \alpha, \beta, \gamma = 90^\circ$ | $a = 76 \text{ \AA}, b = 100 \text{ \AA},$<br>$c = 133 \text{ \AA}; \alpha, \beta, \gamma = 90^\circ$ | $a = 77 \text{ \AA}, b = 101 \text{ \AA},$<br>$c = 129 \text{ \AA}; \alpha, \beta, \gamma = 90^\circ$ | $a = 77 \text{ \AA}, b = 100 \text{ \AA},$<br>$c = 134 \text{ \AA}; \alpha, \beta, \gamma = 90^\circ$ |
| Molecules per asymmetric unit  | 1                                                                                                     | 1                                                                                                    | 1                                                                                                     | 1                                                                                                     | 1                                                                                                     |
| Resolution range (Å)           | 78.12-2.70 (2.85-2.70)                                                                                | 44.82-1.70 (1.79-1.70)                                                                               | 79.73-1.95 (2.06-1.95) <sup>a</sup>                                                                   | 79.43-2.20 (2.32-2.20)                                                                                | 80.13-2.20 (2.32-2.20)                                                                                |
| Total reflections              | 81,594                                                                                                | 263,425                                                                                              | 203,249                                                                                               | 110,030                                                                                               | 114,395                                                                                               |
| Unique reflections             | 13,476                                                                                                | 55,451                                                                                               | 37,249                                                                                                | 25,852                                                                                                | 25,847                                                                                                |
| Redundancy                     | 6.1 (6.0)                                                                                             | 4.8 (4.7)                                                                                            | 5.5 (5.5)                                                                                             | 4.3 (4.3)                                                                                             | 4.4 (4.5)                                                                                             |
| Completeness                   | 99.5 (99.6)                                                                                           | 99.3 (100)                                                                                           | 99.8 (100)                                                                                            | 99.4 (99.7)                                                                                           | 97.8 (99.2)                                                                                           |
| Average $I/\sigma$             | 9.1 (1.2)                                                                                             | 12.2 (1.6)                                                                                           | 11.8 (1.5)                                                                                            | 9.4 (1.1)                                                                                             | 2.9 (0.50)                                                                                            |
| $R_{\text{merge}}$             | 0.096 (1.798)                                                                                         | 0.051 (0.951)                                                                                        | 0.074 (1.209)                                                                                         | 0.071 (1.247)                                                                                         | 0.199 (1.811)                                                                                         |
| $R_{\text{pim}}$               | 0.042 (0.790)                                                                                         | 0.026 (0.481)                                                                                        | 0.035 (0.562)                                                                                         | 0.040 (0.694)                                                                                         | 0.099 (0.936)                                                                                         |
| CC $\frac{1}{2}$               | 0.996 (0.340)                                                                                         | 0.998 (0.514)                                                                                        | 0.996 (0.532)                                                                                         | 0.996 (0.549)                                                                                         | 0.976 (0.472)                                                                                         |
| <i>Refinement statistics</i>   |                                                                                                       |                                                                                                      |                                                                                                       |                                                                                                       |                                                                                                       |
| $R/R_{\text{free}}^{\text{b}}$ | 21.2/ 28.3                                                                                            | 16.6/ 20.4                                                                                           | 19.3/ 24.5                                                                                            | 24.2/ 27.5                                                                                            | 23.5/ 27.2                                                                                            |
| Number of atoms:               |                                                                                                       |                                                                                                      |                                                                                                       |                                                                                                       |                                                                                                       |
| Protein                        | 3731                                                                                                  | 3798                                                                                                 | 3715                                                                                                  | 3708                                                                                                  | 3717                                                                                                  |
| Solvent                        | none                                                                                                  | 331                                                                                                  | 106                                                                                                   | 17                                                                                                    | 76                                                                                                    |
| R.m.s. deviations:             |                                                                                                       |                                                                                                      |                                                                                                       |                                                                                                       |                                                                                                       |
| Bond lengths, Å                | 0.007                                                                                                 | 0.007                                                                                                | 0.008                                                                                                 | 0.009                                                                                                 | 0.008                                                                                                 |
| Bond angles, °                 | 1.189                                                                                                 | 1.114                                                                                                | 1.149                                                                                                 | 1.381                                                                                                 | 1.34                                                                                                  |

<sup>a</sup>Values in brackets are for the highest resolution shell.<sup>b</sup> $R_{\text{free}}$  was calculated from a subset of 5% of the data that were excluded during refinement.
